# Supplementary material
Source: Elsevier journal article supplement (https://www.sciencedirect.com/science/article/pii/S1888429616300073)
Supplement: mmc1 [file S1888429616300073:mmc1.docx]

# A systematic review of controlled trials on visual stress using Intuitive Overlays or Colorimeter

## Supplementary information: search strategy for all databases

|  | coloured filters | AND | reading |  |
| --- | --- | --- | --- | --- |
| OR | coloured overlay | AND | reading |  |
| OR | coloured tint | AND | reading |  |
| OR | coloured lens | AND | reading |  |
| OR | visual stress OR Irlen syndrome OR Meares-Irlen syndrome OR scotopic sensitivity syndrome OR precision tint OR pattern glare OR intuitive colorimeter OR intuitive overlay | | | |
|  |
|  |
|  |

All last accessed in October 2015
